# Supplementary material for: Effectiveness of a Health Coaching Intervention for Patient-Family Dyads to Improve Outcomes Among Adults With Diabetes: A Randomized Clinical Trial
Source: PubMed Central journal article supplement (PMC9664266; doi:10.1001/jamanetworkopen.2022.37960), 2022-11-14
Supplement: jamanetwopen-e2237960-s003.pdf [file jamanetwopen-e2237960-s003.pdf]

## Data Sharing Statement

Rosland. Effectiveness of a Health Coaching Intervention for Patient-Family Dyads to Improve Outcomes Among Adults With Diabetes. *JAMA Netw Open*. Published November 14, 2022. doi:10.1001/jamanetworkopen.2022.37960

### Data

**Data available:** Yes

**Data types:** Deidentified participant data

**How to access data:** Final datasets underlying publications resulting from this research will be shared upon request. Members of the scientific community who would like a de-identified copy of the final datasets (i.e., datasets underlying any publication) from this study can request a copy by contacting the PI. De-identified data may only be provided after requestors and data providers sign a standard federal agency Data Use Agreement

**When available:** With publication

### Supporting Documents

**Document types:** Statistical/analytic code, Informed consent form

**How to access documents:** Contact study contact (study PI Ann-[Marie.rosland@va.gov](mailto:Marie.rosland@va.gov))

**When available:** With publication

### Additional Information

**Who can access the data:** Final datasets underlying publications resulting from this research will be shared upon request. Members of the scientific community who would like a de-identified copy of the final datasets (i.e., datasets underlying any publication) from this study can request a copy by contacting the PI. De-identified data may only be provided after requestors and data providers sign a standard federal agency Data Use Agreement

**Types of analyses:** Analyses included in the published manuscript.

**Mechanisms of data availability:** With study investigator approval and with a signed data access agreement as above.
